# Supplementary material for: BAK1 regulates the accumulation of jasmonic acid and the levels of trypsin proteinase inhibitors in Nicotiana attenuata's responses to herbivory
Source: PubMed Central journal article supplement — J Exp Bot. 2010 Oct 11;62(2):641–52. doi: 10.1093/jxb/erq298 (PMC3003809; doi:10.1093/jxb/erq298), 2010-10-11
Supplement: supp_erq298_00051730-file001.pdf [file supp_erq298_00051730-file001.pdf]

## Supplementary material

### Figure S1. Alignment of SERK proteins

Amino acid sequence alignment of deduced *N. attenuata* NaBAK1, NaSERK1 (partial), *N. benthamiana* NbSERK3/BAK1 (partial), and other SERK proteins. NCBI (GenBank) accession numbers of *SERK* genes and SERK proteins included in this alignment are: *N. attenuata*: NaBAK1 (HM639279), NaSERK1 (HM639280); *N. benthamiana*: NbSERK3/BAK1 (CK291393); *Arabidopsis thaliana*: AtSERK1 (NP\_177328), AtSERK2 (NP\_174683), AtSERK3 (NP\_567920), AtSERK4 (NP\_178999), AtSERK5 (NP\_179000); *Solanum tuberosum*: StSERK1 (ABO14172); *Medicago truncatula*: MtSERK1 (AAN64294); *Oryza sativa*: OsSERK1 (BAD86793); *Zea mays*: ZmSERK1 (CAC37638); ZmSERK2 (CAC37639). Amino acids in white background are different from the consensus sequence.

### Figure S2. Morphology of EV and NaBAK1-VIGS plants

*N. attenuata* plants were inoculated with *Agrobacterium* carrying pTV00 empty vector or pTV-NaBAK1 to generate EV and NaBAK1-silenced (NaBAK1-VIGS) plants, respectively. (A) Plants at early elongation stage. (B) Plants at flowering stage.

### Figure S3. NaBAK1 positively regulates the W+OS- and W+W-induced accumulation of jasmonic acid (JA) and JA-isoleucine (JA-Ile).

Leaves of EV and NaBAK1-VIGS plants were wounded with a pattern wheel and 20  $\mu$ l of water (W+W) or *M. sexta* oral secretions (W+OS) were immediately applied to each leaf. Individual leaves from 5 replicate plants were harvested at the indicated times. Asterisks represent significantly different levels between EV and NaBAK1-VIGS plants at indicated times (unpaired *t*-test; \*,  $p < 0.05$ ; \*\*,  $p < 0.01$ ; \*\*\*,  $p < 0.001$ ; N = 5). (A) Mean ( $\pm$  SE) JA concentrations in EV and NaBAK1-VIGS plants. (B) Mean ( $\pm$  SE) JA-Ile concentrations in EV and NaBAK1-VIGS

plants.

**Figure S4. EV and NaBAK1-VIGS plants have the same levels of SA and ethylene production after W+OS induction.**

Leaves of EV and NaBAK1-VIGS plants were wounded with a pattern wheel and 20  $\mu$ l of water (W+W), *M. sexta* oral secretions (W+OS), or FAC A solution (W+FAC) were immediately applied to each leaf. Individual leaves from 5 replicate plants were harvested after 1.5 h.

Asterisks represent significantly different levels between EV and NaBAK1-VIGS plants at indicated times (unpaired *t*-test; \*,  $p < 0.05$ ; \*\*,  $p < 0.01$ ; \*\*\*,  $p < 0.001$ ; N = 5). (A) Mean SA concentrations ( $\pm$  SE) in EV and NaBAK1-VIGS plants. Leaves of EV and NaBAK1-VIGS plants were wounded with a pattern wheel and treated with 20  $\mu$ l of *M. sexta* OS (W+OS). (B) Ethylene emission ( $\pm$  SE) was measured using a photoacoustic spectrometer 5 h after W+OS treatment (N = 5).

**Figure S5. Transcript accumulation of JA biosynthetic genes in EV and NaBAK1-VIGS plants**

Mean transcript levels ( $\pm$  SE) of *NaLOX3* (A), *NaAOS* (B), *NaAOC* (C), *NaOPR3* (D), and *NaACX1* (E) were measured with qPCR. Asterisks represent significantly different levels between EV and NaBAK1-VIGS plants at indicated times (unpaired *t*-test; \*,  $p < 0.05$ ; \*\*,  $p < 0.01$ ; \*\*\*,  $p < 0.001$ ; N = 5).

**Figure S6. EV and NaBAK1-VIGS plants have similar levels of DTGs in response to W+OS and MeJA treatment**

(A) Leaves from EV and NaBAK1-VIGS plants were left untreated (control) or wounded with a pattern wheel and 20  $\mu$ l of *M. sexta* oral secretions were immediately applied to each leaf (W+OS). Samples were harvested three days after treatment, and DTG content were determined.

(B) EV and NaBAK1-VIGS leaves were treated with 20  $\mu\text{l}$  of lanolin or lanolin containing MeJA ( $7.5 \mu\text{g } \mu\text{l}^{-1}$ ). Samples were harvested three days after treatment, and DTG content were determined. Error bars represent standard errors; different letters indicate significant differences (two-way ANOVA, Fisher's PLSD test;  $p < 0.05$ ;  $N = 5$ ).

**Figure S7. *M. sexta* has similar growth rates on EV and NaBAK1-VIGS plants**

Each EV and NaBAK1-VIGS plant was infested with one *M. sexta* neonate. The larval mass was subsequently recorded on day 6, 8, and 11 ( $N = 25$ ).

|              |                                                                      |     |
|--------------|----------------------------------------------------------------------|-----|
| MtSERK1      | ----MEET--KFCALAFICAFFLLLHPLWLVSANMEGDALHNLRTNLQD---PNNVLQ           | 50  |
| OsSERK1      | ----MAHR---WAVWAVLLLRLLVP--AARVLANMEGDALHSLRTNLVD---PNNVLQ           | 47  |
| ZmSERK1      | ----MAASL---RWWWSAVVFSVVVG--VIFVVANTEGDALYSLRQSLKD---NNNVLQ          | 47  |
| StSERK1      | ----MVKVMEKDAVVVSLVWVLLLVVHHLKLIYANMEGDALHSLRVNLQD---PNNVLQ          | 52  |
| NaSERK1      | -----                                                                | 0   |
| AtSERK1      | ----MES----SYVVFILLSLILLPNHSLWLASANLEGDALHILRVTLVD---PNNVLQ          | 48  |
| AtSERK2      | ----MGRKKFEAFGFVCLISLLLLFN-SLWLASNNMEGDALHSLRANLVD---PNNVLQ          | 51  |
| ZmSERK2      | ----MAASASAGRWWAVVLAVAVLLG--PGQVVANTEGDALYSLRQSLKD---ANNVLQ          | 50  |
| AtSERK3/BAK1 | ----MERRLMIPCFFWLILVLDLVLRLR---VSENAEGDALSAKNSLAD---PNKVLQ           | 47  |
| NaSERK3/BAK1 | ----MDQWILG--ILGFVSAFLCLIGLLLVESANIEGDALNALKTNLAD---PNNVLQ           | 50  |
| NbSERK3/BAK1 | -----                                                                | 0   |
| AtSERK4/BKK1 | MTSSKMEQRSLL-CFLYLLLLFNFTLR---VAGNAEGDALTQKNSLSSGDPANNVLQ            | 54  |
| AtSERK5      | ----MEHGSSR-GFIWLLLELDFVSR---VTGKTQVDALIALRSSLSSGDHTNNILQ            | 49  |
| MtSERK1      | <b>SWDPTLVNPTWFHVTCNNDNSVIRVDLGNAA</b> LSGTLVPQLGQLKNLQYLELYSNNITGP  | 110 |
| OsSERK1      | <b>SWDPTLVNPTWFHVTCNNDNSVIRVDLGNAA</b> LSGTLVPQLGQLKNLQYLELYSNNISGT  | 107 |
| ZmSERK1      | <b>SWDPTLVNPTWFHVTCNNDNSVIRVDLGNAA</b> LSGELVPQLGQLKNLQYLELYSNNISGP  | 107 |
| StSERK1      | <b>SWDPTLVNPTWFHVTCNNDNSVIRVDLGNAA</b> LSGTLVPQLGQLKNLQYLELYSNNISGL  | 112 |
| NaSERK1      | -----                                                                | 0   |
| AtSERK1      | <b>SWDPTLVNPTWFHVTCNNDNSVIRVDLGNAA</b> LSGHLVPELGLKKNLQYLELYSNNITGP  | 108 |
| AtSERK2      | <b>SWDPTLVNPTWFHVTCNNDNSVIRVDLGNAA</b> LSGQLVPQLGQLKNLQYLELYSNNITGP  | 111 |
| ZmSERK2      | <b>SWDPTLVNPTWFHVTCNNDNSVIRVDLGNAA</b> LSGVLVPQLGQLKNLQYLELYSNNISGT  | 110 |
| AtSERK3/BAK1 | <b>SWDATLVNPTWFHVTCNNDNSVIRVDLGNAA</b> LSGQLVLPQLGQLKNLQYLELYSNNITGT | 107 |
| NaSERK3/BAK1 | <b>SWDPTLVNPTWFHVTCNNDNSVIRVDLGNAA</b> LSGQLVPQLGQLKNLQYLELYSNNISGR  | 110 |
| NbSERK3/BAK1 | -----                                                                | 0   |
| AtSERK4/BKK1 | <b>SWDATLVNPTWFHVTCNNDNSVIRVDLGNAA</b> LSGKLVPELGLKNLQYLELYSNNITGE   | 114 |
| AtSERK5      | <b>SWNATLVNPTWFHVTCNNDNSVIRVDLGNAA</b> LSGELVPQLGQLKNLQYLELYSNNITGE  | 109 |
| MtSERK1      | <b>IPSDLGNTNLVSLDLYLNRFNGPI</b> PDSLGKLSKLRFLRLNNSLMGPIPMSLTNISALQ   | 170 |
| OsSERK1      | <b>IPSELGNTNLVSLDLYLNRFNGPI</b> PDSLGKLLKLRFLRLNNSLSGSIPIKSLTALITALQ | 167 |
| ZmSERK1      | <b>IPPELGNTNLVSLDLYLNRFNGPI</b> PDITLGLSKLRFLRLNNSLSGQIPIKTLTNINTLQ  | 167 |
| StSERK1      | <b>IPSDLGNTNLVSLDLYLNRFNGPI</b> PDSLGKLSKLRFLRLNNSLTGNIIPMSLTNISSLQ  | 172 |
| NaSERK1      | -----                                                                | 0   |
| AtSERK1      | <b>IPSNLGNTNLVSLDLYLNRFNGPI</b> PELGLKLSKLRFLRLNNSLTGSIIPMSLTNITTLQ  | 168 |
| AtSERK2      | <b>VPSDLGNTNLVSLDLYLNRFNGPI</b> PDSLGKLEKLRFLRLNNSLTGPIIPMSLTNIMTLQ  | 171 |
| ZmSERK2      | <b>IPPELGNTNLVSLDLYLNRFNGPI</b> PDSLGKLVKLRFLRLNNSLVGPIIPMSLTNISTLQ  | 170 |
| AtSERK3/BAK1 | <b>IPEQLGNTNLVSLDLYLNRFNGPI</b> PSTLGLKLRFLRLNNSLSGEIIPMSLTAVITLQ    | 167 |
| NaSERK3/BAK1 | <b>IPPELGNTNLVSLDLYLNRFNGPI</b> PDITLGLKLRFLRLNNSLVGRIIPMLTIVISLQ    | 170 |
| NbSERK3/BAK1 | -----                                                                | 0   |
| AtSERK4/BKK1 | <b>IPEELGNTNLVSLDLYLNRFNGPI</b> PSISGLKLGKLRFLRLNNSLSGEIIPMLTISVQ-LQ | 173 |
| AtSERK5      | <b>IPEELGNTNLVSLDLYLNRFNGPI</b> PSISGLKLGKLRFLRLNNSLSGEIIPMSLTALP-LD | 168 |

MtSERK1 VLDLSNNQLSGVVPDNGSFSLSLFTPISFANNLNLCGPVTGHPCPGSPPFSPPPPFVPPPI 230  
 OsSERK1 VLDLSNNNLSGVEPSTGFSLSLFTPISFANNPSLCGPSTTKPCPGAPPFSPPPPYNPPTPV 227  
 ZmSERK1 VLDLSNNNLSGVEPSSGFSLSLFTPISFANNPNLCGPSTTKPCPGAPPFSPPPPYNPPAP- 226  
 StSERK1 VLDLSNNRSLGVVPDNGSFSLSLFTPISFANNLLDLCGPVTGRPCPGSPPFSPPPPFVPPPI 232  
 NaSERK1 ----- 0  
 AtSERK1 VLDLSNNRSLGSVVPDNGSFSLSLFTPISFANNLLDLCGPVTSHPCPGSPPFSPPPPFVPPPI 228  
 AtSERK2 VLDLSNNRSLGSVVPDNGSFSLSLFTPISFANNLLDLCGPVTSRCPGSPPFSPPPPFVPPPI 231  
 ZmSERK2 VLDLSNNNLSGQVPESTGFSLSLFTPISFANNPNLCGPSTSKPCPGAPPFSPPPPFNPPSP 230  
 AtSERK3/BAK1 VLDLSNNELTGDIPVNGSFSLSLFTPISFANTKLTP-----LP-----ASPPPFISPTPP 215  
 NaSERK3/BAK1 VLDLSNNNLTGFEVNGSFSLSLFTPISFANNP-----LDIPPAAPPPFISPTPTS 219  
 NbSERK3/BAK1 ----- 0  
 AtSERK4/BKK1 VLDTSNRSLSGDIPVNGSFSLSLFTPISFANNSLTD-----LP-----PPPTSTSTPTTP 221  
 AtSERK5 VLDTSNRSLSGDIPVNGSFSLSLFTPISFANNKLR-----PPPASPSPS-- 210

MtSERK1 SPGSGGATGAIAGGVAAGAALLFAAPAIAFAWRRRKQEEFFDVPAAEDPEVHLGQLK 290  
 OsSERK1 QSPGSSSTGAIAGGVAAGAALLFAAPAIAFAWRRRKQEEFFDVPAAEDPEVHLGQLK 287  
 ZmSERK1 TSSKGVSSSTGAIAGGVAAGTALLFAAPAIAFAWRRRKQEEFFDVPAAEDPEVHLGQLK 286  
 StSERK1 SPGNGATGAIAGGVAAGAALLFAAPAIAFAWRRRKQEEFFDVPAAEDPEVHLGQLK 292  
 NaSERK1 ----- 0  
 AtSERK1 STPSGYGITGAIAGGVAAGAALLFAAPAIAFAWRRRKQLDFFDVPAAEDPEVHLGQLK 288  
 AtSERK2 PTPGGYSATGAIAGGVAAGAALLFAAPAIAFAWRRRKQEEFFDVPAAEDPEVHLGQLK 291  
 ZmSERK2 TQSTGASSTGAIAGGVAAGAALLFAAPAIAFAWRRRKQEEFFDVPAAEDPEVHLGQLK 290  
 AtSERK3/BAK1 SPAGSNRITGAIAGGVAAGAALLFAAPAIAFAWRRRKQDHFDDVPAAEDPEVHLGQLK 275  
 NaSERK3/BAK1 SSGVGNISATGAIAGGVAAGAALLFAAPAIAFAWRRRKQDHFDDVPAAEDPEVHLGQLK 279  
 NbSERK3/BAK1 ----- 0  
 AtSERK4/BKK1 PPSGG-QMTAIAAGGVAAGAALLFAAPAIAFAWRRRKQDHFDDVPAAEDPEVHLGQLK 280  
 AtSERK5 -PSG---TSAATVVGVAAGAALLFAL-----AWWLRRLQSHFLDVPAAEDPEVYLGQFK 261

MtSERK1 RFSLRELQVATDIFSNKNILGRGGFGKVKYKGRADGSLVAVKRLKEERTPGGELQFQTEV 350  
 OsSERK1 RFSLRELQVATDIFSNKNILGRGGFGKVKYKGRADGSLVAVKRLKEERTPGGELQFQTEV 347  
 ZmSERK1 RFSLRELQVATDNEFNENLGRGGFGKVKYKGRLDGSLVAVKRLKEERTPGGELQFQTEV 346  
 StSERK1 RFSLRELQVATDSFSNKNILGRGGFGKVKYKGRADGSLVAVKRLKEERTPGGELQFQTEV 352  
 NaSERK1 ----- 0  
 AtSERK1 RFSLRELQVATDIFSNKNILGRGGFGKVKYKGRADGTLVAVKRLKEERTPGGELQFQTEV 348  
 AtSERK2 RFSLRELQVATDIFSNKNILGRGGFGKVKYKGRADGTLVAVKRLKEERTPGGELQFQTEV 351  
 ZmSERK2 RFSLRELQVATDNEFNENLGRGGFGKVKYKGRADGSLVAVKRLKEERTPGGELQFQTEV 350  
 AtSERK3/BAK1 RFSLRELQVATDNEFNENLGRGGFGKVKYKGRADGTLVAVKRLKEERTPGGELQFQTEV 335  
 NaSERK3/BAK1 RFSLRELQVATDNEFNENLGRGGFGKVKYKGRADGTLVAVKRLKEERTPGGELQFQTEV 339  
 NbSERK3/BAK1 ----- 0  
 AtSERK4/BKK1 RFTLRELIVATDNEFNENLGRGGFGKVKYKGRADGTLVAVKRLKEERTPGGELQFQTEV 340  
 AtSERK5 RFSLRELIVATEKFSKRNVLGKGRFGILYKGRADTLVAVKRLNEERTPGGELQFQTEV 321

|              |                                                               |     |
|--------------|---------------------------------------------------------------|-----|
| MtSERK1      | EMISMAVHRNLLRLRGFCMTPTERLLVYPYMANGSVASCLRERPPHQEPLDWPTRKRIAL  | 410 |
| OsSERK1      | EMISMAVHRNLLRLRGFCMTPTERLLVYPYMANGSVASCLRERPPSEPLDWRTRRRRIAL  | 407 |
| ZmSERK1      | EMISMAVHRNLLRLRGFCMTPTERLLVYPYMANGSVASCLRERAPNEPPELWETRARIAL  | 406 |
| StSERK1      | EMISMAVHRNLLRLRGFCMTPTERLLVYPYMANGSVASCLRERPPSEPLDWPTRKRIAL   | 412 |
| NaSERK1      | -----NGSVASCLRERPPSEPLDWPTRKRIAL                              | 28  |
| AtSERK1      | EMISMAVHRNLLRLRGFCMTPTERLLVYPYMANGSVASCLRERPPSPPLDWPTRKRIAL   | 408 |
| AtSERK2      | EMISMAVHRNLLRLRGFCMTPTERLLVYPYMANGSVASCLRERPPSPPLAWSIRQQIAL   | 411 |
| ZmSERK2      | EMISMAVHRNLLRLRGFCMTPTERLLVYPYMANGSVASCLRERPPSEPLSWEPRRRRIAL  | 410 |
| AtSERK3/BAK1 | EMISMAVHRNLLRLRGFCMTPTERLLVYPYMANGSVASCLRERPPSPPLDWPKRRIAL    | 395 |
| NaSERK3/BAK1 | EMISMAVHRNLLRLRGFCMTPTERLLVYPYMANGSVASCLRERPPSPPLEWSIRKRIAL   | 399 |
| NbSERK3/BAK1 | -----                                                         | 0   |
| AtSERK4/BKK1 | EMISMAVHRNLLRLRGFCMTPTERLLVYPYMANGSVASCLRERPEGNPPLDWPKRKHIAL  | 400 |
| AtSERK5      | EMISMAVHRNLLRLRGFCMTPTERLLVYPYMANGSVASCLRERPEGNPPLDWPKRKHIAL  | 381 |
|              |                                                               |     |
| MtSERK1      | GSARGLSYLHDHCDPKIIHRDVKAANILLDEEFEAVVGDFGLAKLMDYKDHVTTAVRGT   | 470 |
| OsSERK1      | GSARGLSYLHDHCDPKIIHRDVKAANILLDEEFEAVVGDFGLAKLMDYKDHVTTAVRGT   | 467 |
| ZmSERK1      | GSARGLSYLHDHCDPKIIHRDVKAANILLDEEFEAVVGDFGLAKLMDYKDHVTTAVRGT   | 466 |
| StSERK1      | GSARGLSYLHDHCDPKIIHRDVKAANILLDEEFEAVVGDFGLAKLMDYKDHVTTAVRGT   | 472 |
| NaSERK1      | GSARGLSYLHDHCDPKIIHRDVKAANILLDEEFEAVVGDFGLAKLMDYKDHVTTAVRGT   | 88  |
| AtSERK1      | GSARGLSYLHDHCDPKIIHRDVKAANILLDEEFEAVVGDFGLAKLMDYKDHVTTAVRGT   | 468 |
| AtSERK2      | GSARGLSYLHDHCDPKIIHRDVKAANILLDEEFEAVVGDFGLAKLMDYKDHVTTAVRGT   | 471 |
| ZmSERK2      | GSARGLSYLHDHCDPKIIHRDVKAANILLDEEFEAVVGDFGLAKLMDYKDHVTTAVRGT   | 470 |
| AtSERK3/BAK1 | GSARGLSYLHDHCDPKIIHRDVKAANILLDEEFEAVVGDFGLAKLMDYKDHVTTAVRGT   | 455 |
| NaSERK3/BAK1 | GSARGLSYLHDHCDPKIIHRDVKAANILLDEEFEAVVGDFGLAKLMDYKDHVTTAVRGT   | 459 |
| NbSERK3/BAK1 | -----                                                         | 0   |
| AtSERK4/BKK1 | GSARGLSYLHDHCDPKIIHRDVKAANILLDEEFEAVVGDFGLAKLMNYNDSHVTTAVRGT  | 460 |
| AtSERK5      | GSARGLSYLHDHCDPKIIHRDVKAANILLDEEFEAVVGDFGLAKLMNYNDSHVTTAVRGT  | 441 |
|              |                                                               |     |
| MtSERK1      | IGHIAPEYLSHGKSSSEKTDVFGYGYMELLEITGQRAFDLARLANDDDVMLLDWVKGLLKE | 530 |
| OsSERK1      | IGHIAPEYLSHGKSSSEKTDVFGYGYMELLEITGQRAFDLARLANDDDVMLLDWVKGLLKE | 527 |
| ZmSERK1      | IGHIAPEYLSHGKSSSEKTDVFGYGYMELLEITGQRAFDLARLANDDDVMLLDWVKGLLKE | 526 |
| StSERK1      | IGHIAPEYLSHGKSSSEKTDVFGYGYMELLEITGQRAFDLARLANDDDVMLLDWVKGLLKE | 532 |
| NaSERK1      | IGHIAPEYLSHGKSSSEKTDVFGYGYMELLEITGQRAFDLARLANDDDVMLLDWVKGLLKE | 148 |
| AtSERK1      | IGHIAPEYLSHGKSSSEKTDVFGYGYMELLEITGQRAFDLARLANDDDVMLLDWVKGLLKE | 528 |
| AtSERK2      | IGHIAPEYLSHGKSSSEKTDVFGYGYMELLEITGQRAFDLARLANDDDVMLLDWVKGLLKE | 531 |
| ZmSERK2      | IGHIAPEYLSHGKSSSEKTDVFGYGYMELLEITGQRAFDLARLANDDDVMLLDWVKGLLKE | 530 |
| AtSERK3/BAK1 | IGHIAPEYLSHGKSSSEKTDVFGYGYMELLEITGQRAFDLARLANDDDVMLLDWVKGLLKE | 515 |
| NaSERK3/BAK1 | IGHIAPEYLSHGKSSSEKTDVFGYGYMELLEITGQRAFDLARLANDDDVMLLDWVKGLLKE | 519 |
| NbSERK3/BAK1 | -----VFGYGYMELLEITGQRAFDLARLANDDDVMLLDWVKGLLKE                | 41  |
| AtSERK4/BKK1 | IGHIAPEYLSHGKSSSEKTDVFGYGYMELLEITGQRAFDLARLANDDDVMLLDWVKGLLKE | 520 |
| AtSERK5      | IGHIAPEYLSHGKSSSEKTDVFGYGYMELLEITGQRAFDLARLANDDDVMLLDWVKGLLKE | 501 |

|              |                                                              |     |
|--------------|--------------------------------------------------------------|-----|
| MtSERK1      | KKLEMLVDPDLKTNYTEAEVEQLIQVALLCTQSSPMERPKMSEVVRMLEGDGLAERWEW  | 590 |
| OsSERK1      | KKLEMLVDPDLQSNYLDVEVESLIQVALLCTQSSPMERPKMSEVVRMLEGDGLAERWEW  | 587 |
| ZmSERK1      | KKLEMLVDPDLQGRYVDQEVESLIQVALLCTQSSPMERPKMSEVVRMLEGDGLAERWEW  | 586 |
| StSERK1      | KKLEMLVDPDLQNKYVEAEVEQLIQVALLCTQSSPMERPKMSEVVRMLEGDGLAERWEW  | 592 |
| NaSERK1      | KKLEMLVDPDLQNKYVEAEVEQLIQVALLCTQSSPMERPKMSEVVRMLEGDGLAERWEW  | 208 |
| AtSERK1      | KKLEMLVDPDLQINYEVEVELEQLIQVALLCTQSSPMERPKMSEVVRMLEGDGLAERWEW | 588 |
| AtSERK2      | KKLEMLVDPDLQSNYTEAEVEQLIQVALLCTQSSPMERPKMSEVVRMLEGDGLAERWEW  | 591 |
| ZmSERK2      | KKLEMLVDPDLQKAYEVEVESLIQVALLCTQSSPMERPKMSEVVRMLEGDGLAERWEW   | 590 |
| AtSERK3/BAK1 | KKLEMLVDVLDLQGNKDEEVEQLIQVALLCTQSSPMERPKMSEVVRMLEGDGLAERWEW  | 575 |
| NaSERK3/BAK1 | KKYEMLVDADLQGNYEVEVEQLIQVALLCTQSSPMERPKMSEVVRMLEGDGLAERWEW   | 579 |
| NbSERK3/BAK1 | KKYEMLVDADLQGNYEVEVEQLIQVALLCTQSSPMERPKMSEVVRMLEGDGLAERWEW   | 101 |
| AtSERK4/BKK1 | KKLESILVDAELEGKYVEVEVEQLIQVALLCTQSSPMERPKMSEVVRMLEGDGLAERWEW | 580 |
| AtSERK5      | KKLESILVDAELEGKYVEVEVEQLIQVALLCTQSSPMERPKMSEVVRMLEGDGLAERWEW | 561 |
| MtSERK1      | QKGEVLRQEVVELAPHPNS--DWIV--DSTENLHAVELSGPR                   | 627 |
| OsSERK1      | QKIEVVRQEVVELGPHNS--EWIV--DSTENLHAVELSGPR                    | 624 |
| ZmSERK1      | QKVEVVRQEVVELAPRHN---DWIV--DSTYNLRAVELSGPR                   | 622 |
| StSERK1      | QKVEVLRQEVVELAPHPNS--DWIV--DSTENLHAVELSGPR                   | 629 |
| NaSERK1      | QKVEVLRQEVVELAPHPNS--DWIV--DSTENLHAVELSGPR                   | 245 |
| AtSERK1      | QKVEVLRQEVVELAPHPNS--DWIV--DSTENLHAVELSGPR                   | 625 |
| AtSERK2      | QKVEVLRQEVVELSSHPTS--DWIL--DSTENLHAVELSGPR                   | 628 |
| ZmSERK2      | QKVEVVRQEVVELAPLRN---DWIV--DSTYNLRAVELSGPR                   | 626 |
| AtSERK3/BAK1 | QKEEMVRQDFNYPTHHPAVSGWIIIGDSTSQIENEYESGPR                    | 615 |
| NaSERK3/BAK1 | QKEEMVRQDYP-AHHPHT--DWIIGDSTYNLRPEELSGPR                     | 616 |
| NbSERK3/BAK1 | QKEEMVRQDYP-AHHPHT--DWIIGDSTYNLRPEELSGPR                     | 138 |
| AtSERK4/BKK1 | QKEEMPIHDFNYQAYPHAGTDWLIPIYSNLIENDYESGPR                     | 620 |
| AtSERK5      | QKEEMPIHDFNYQAYPHAGTDWLIPIYSNLIENDYESGPR                     | 601 |

Figure S1

**A**

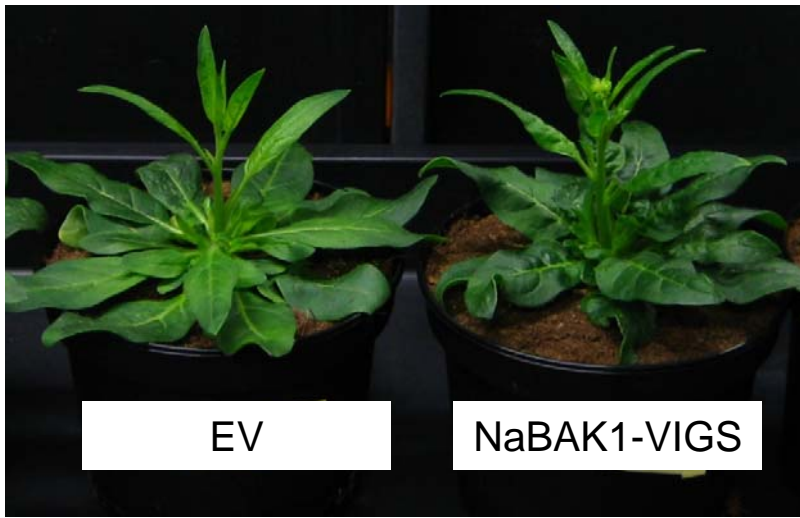

**B**

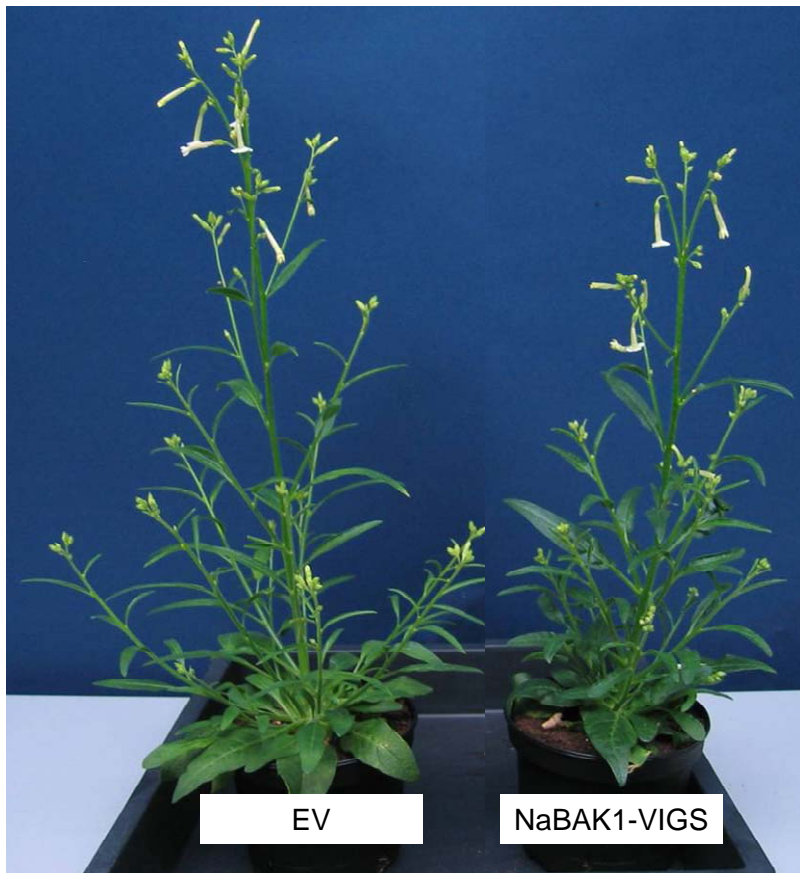

Figure S2



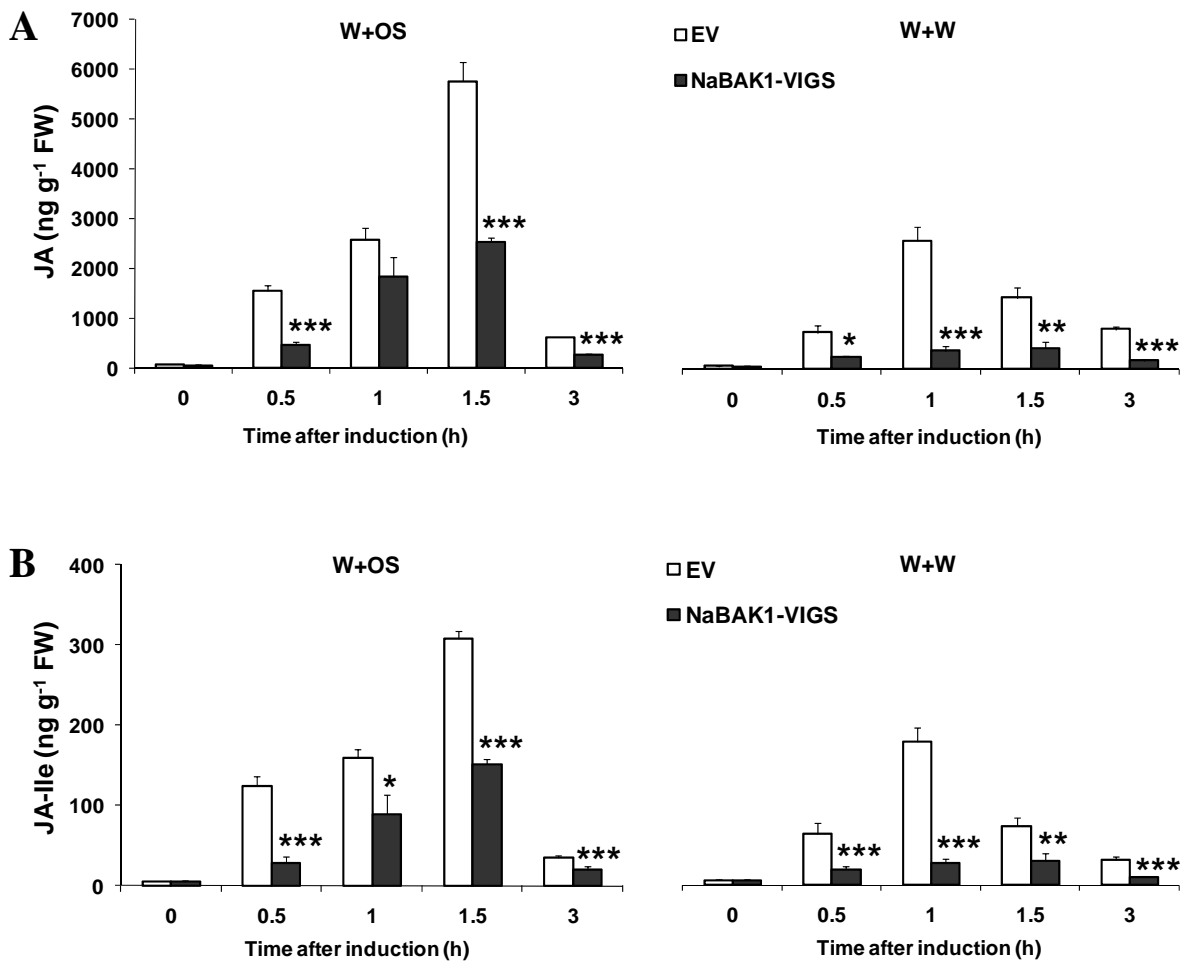

Figure S3

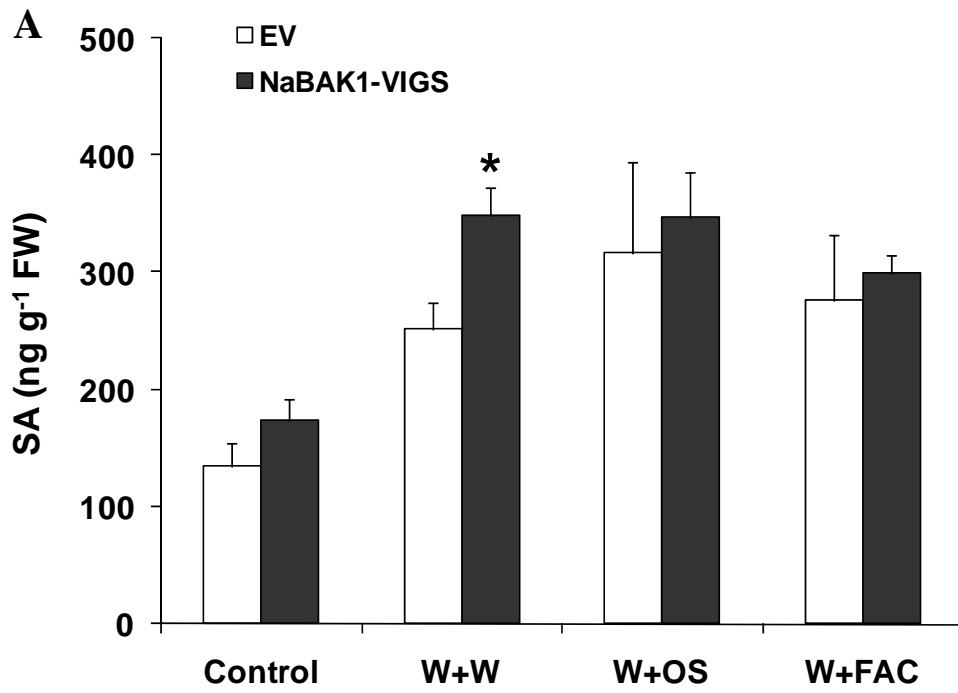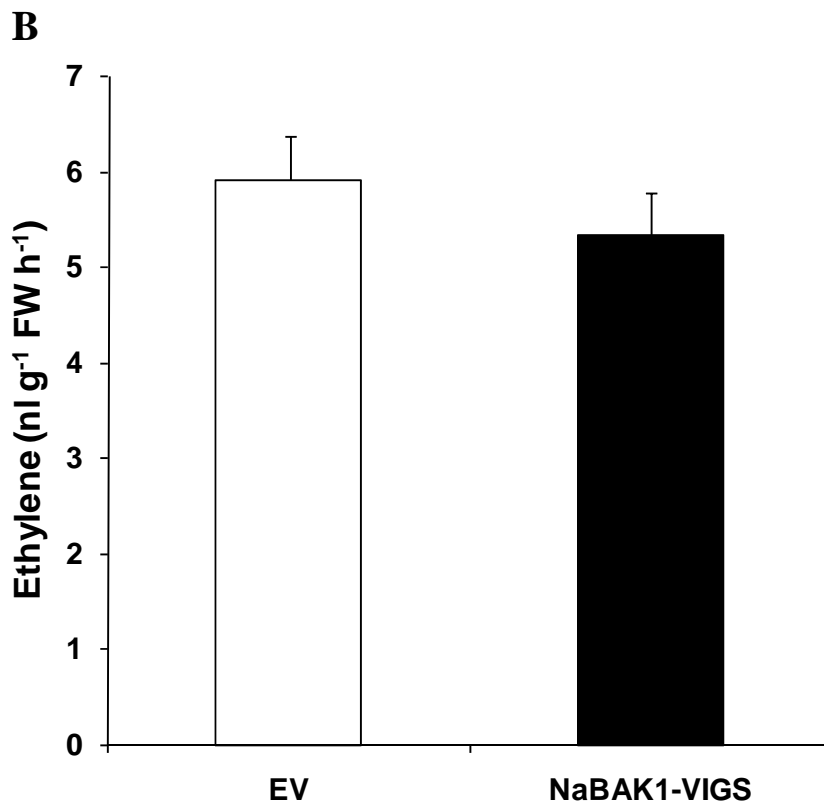

Figure S4

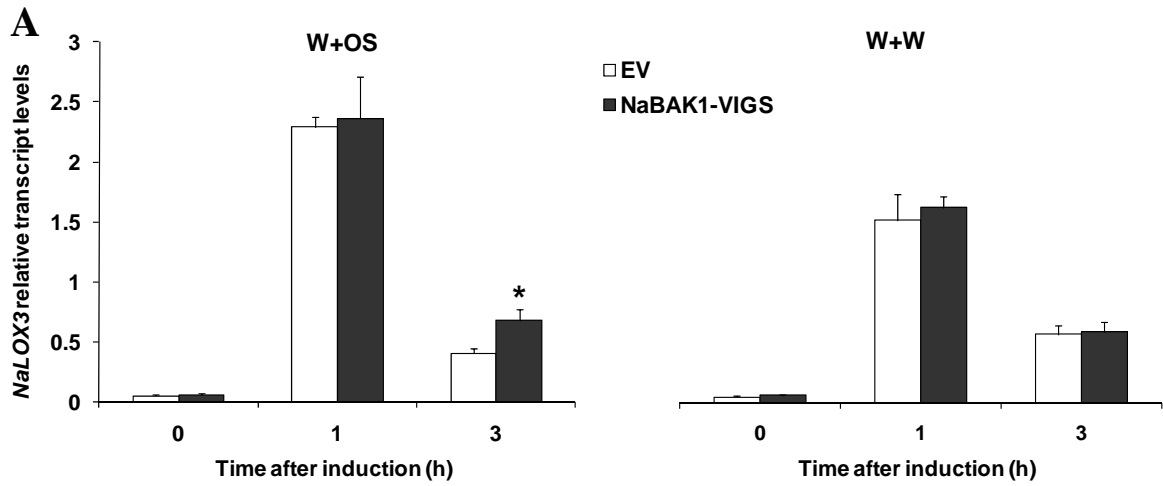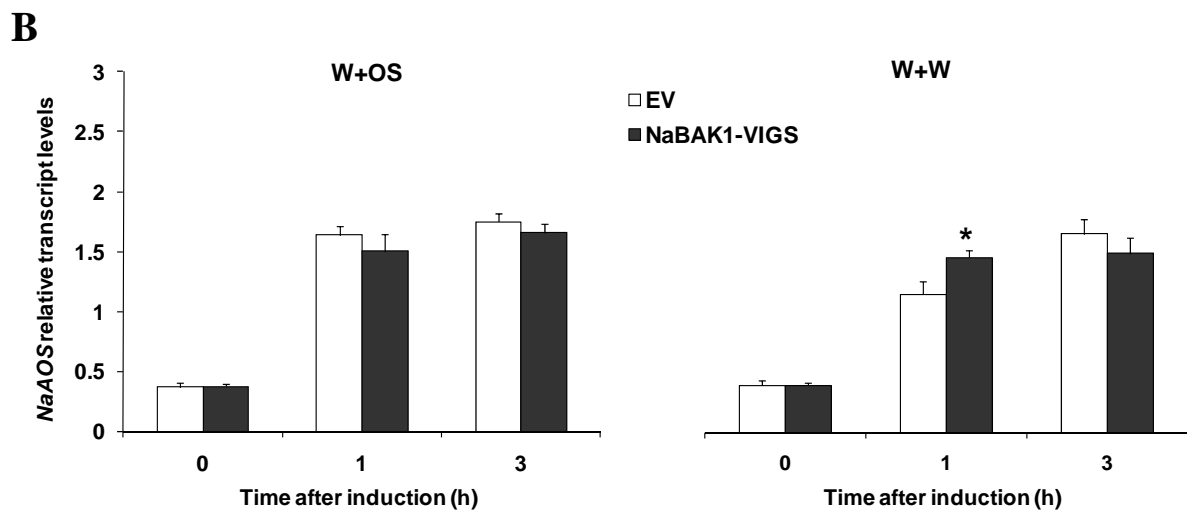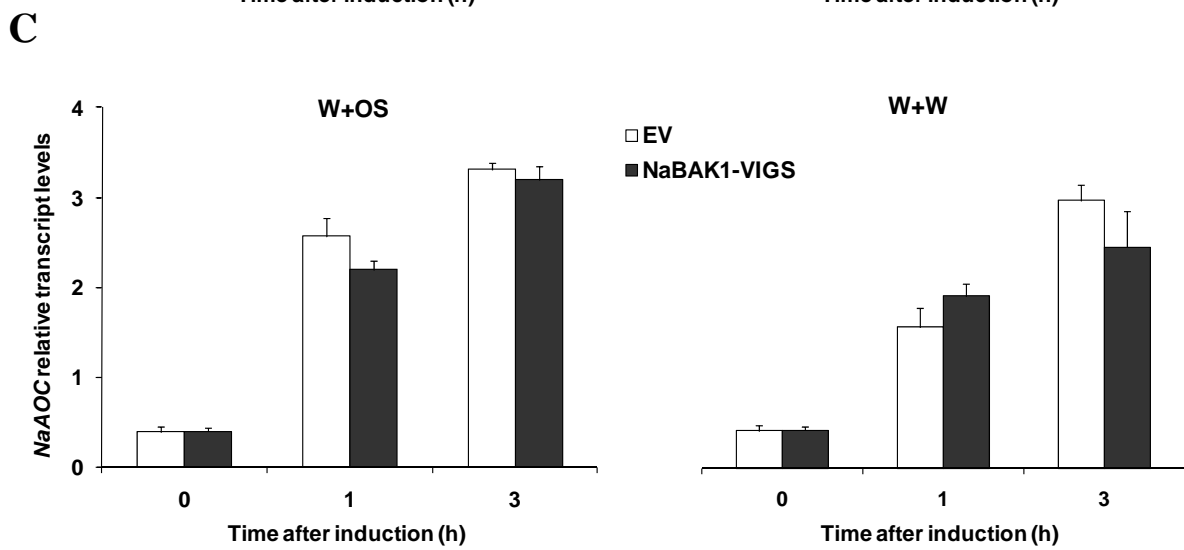

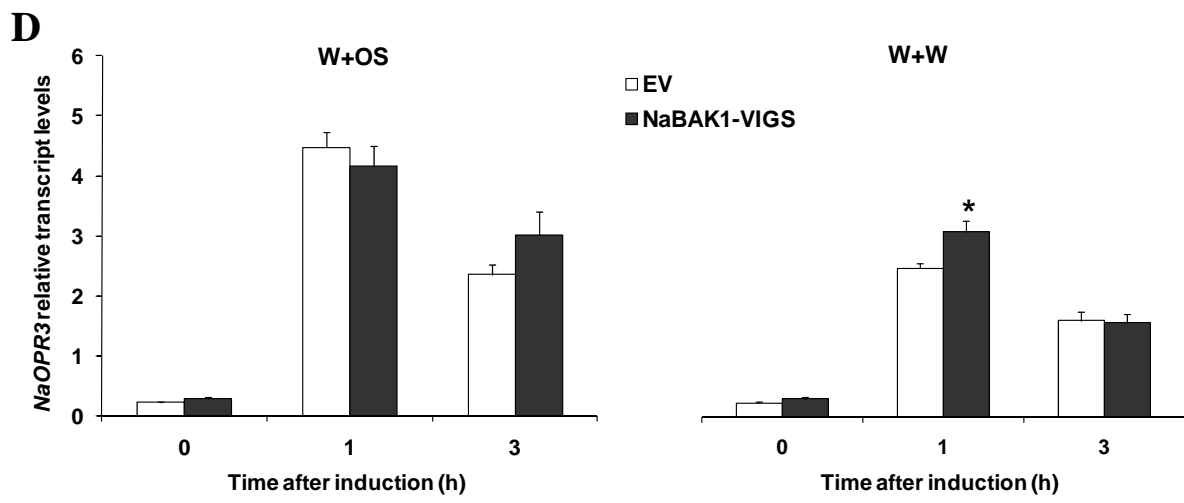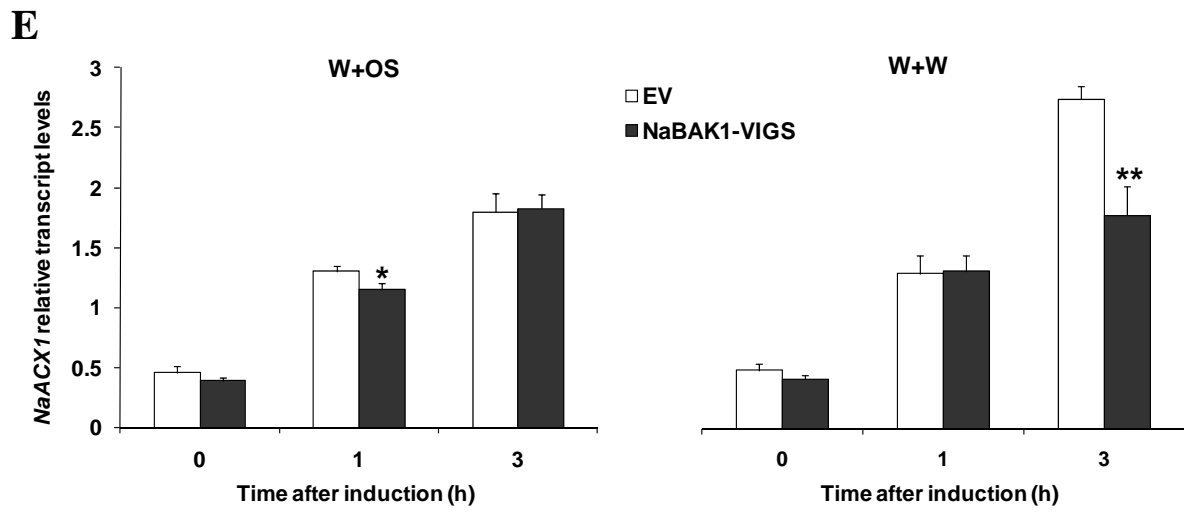

Figure S5

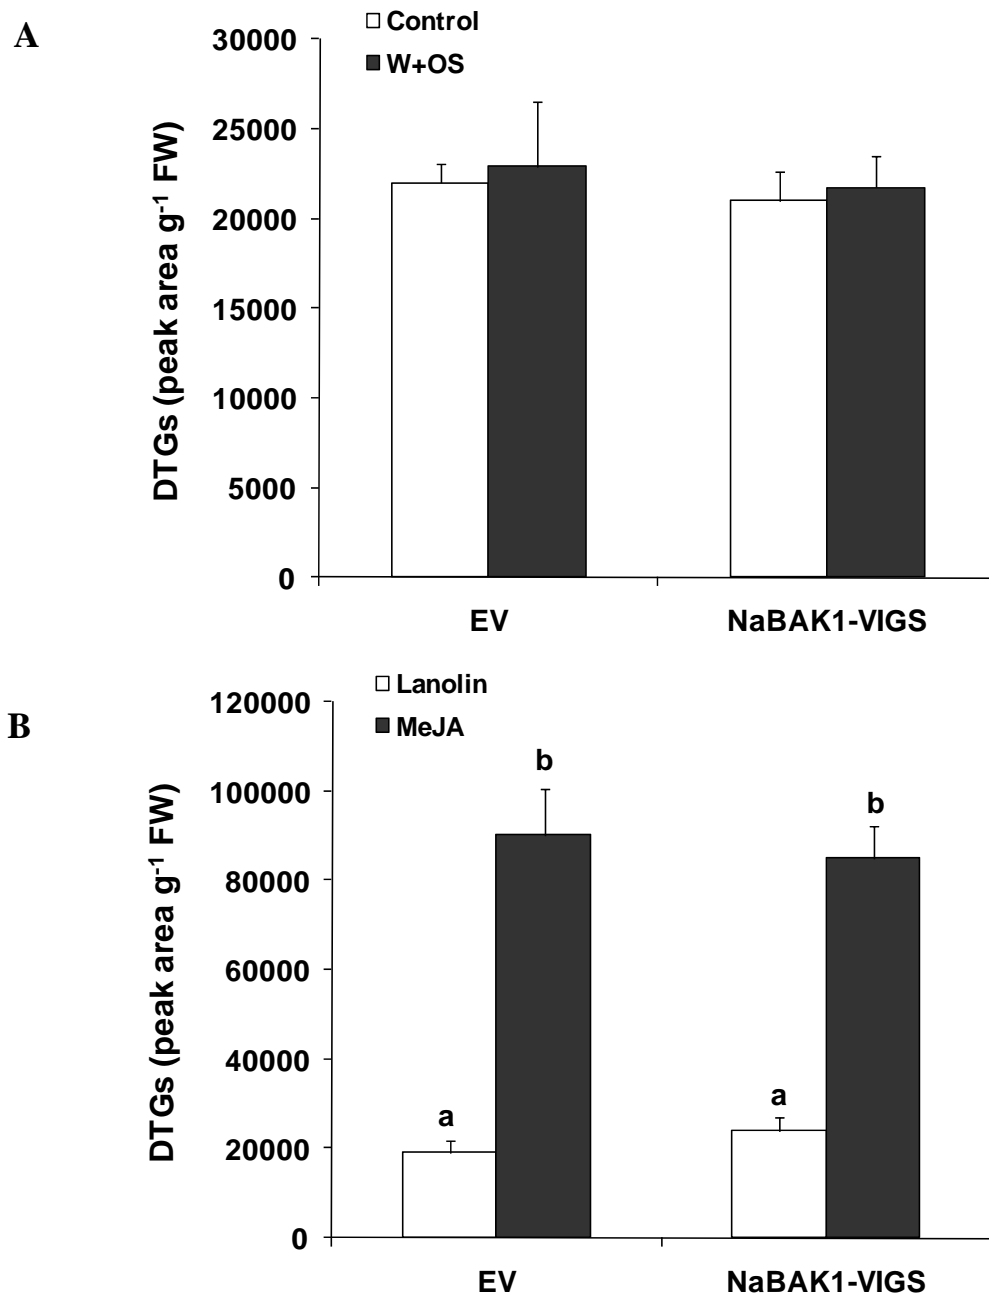

Figure S6

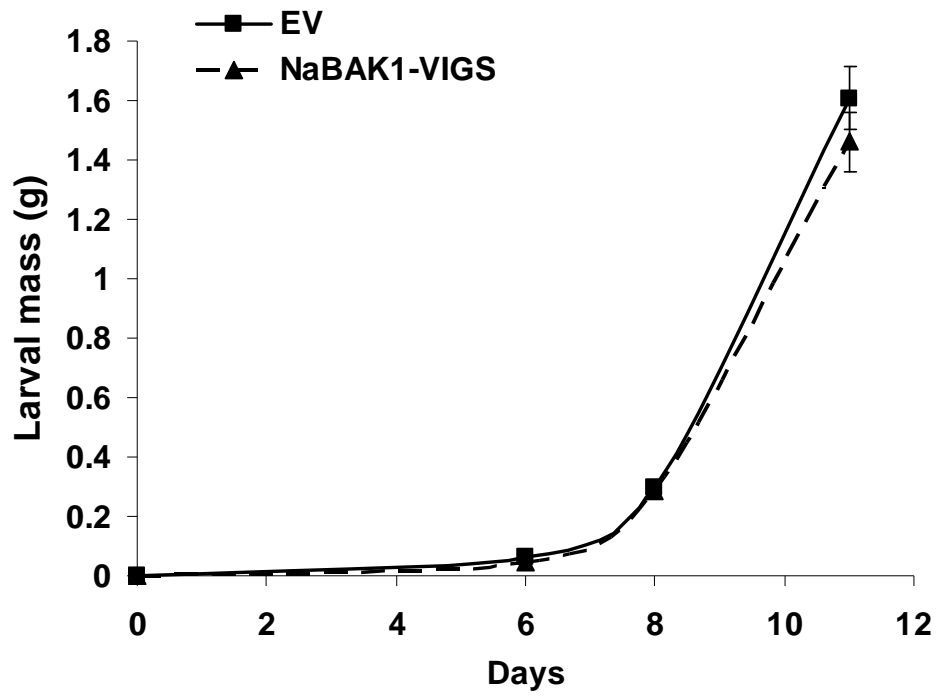

Figure S7

**Table S1 Primers used for cloning of NaBAK1 and NaSERK1, and preparation of pTV-NaBAK1 construct**

| <i>Genes</i>             | <i>Primer (5'-3')*</i>                   |
|--------------------------|------------------------------------------|
| <i>NaBAK1-1</i>          | ATGGATCAATGGATATTGGGGATC                 |
| <i>NaBAK1-2</i>          | GAACACCCACTATCTGATACATCCAG               |
| <i>NaSERK1-1</i>         | AATGGAAGTGTTGCATCGTGCCTG                 |
| <i>NaSERK1-2</i>         | CGCCTATGTTCAACTTGTCAGGGCATAG             |
| <i>NaBAK1-VIGS-BamHI</i> | ACGT <u>GGATCC</u> AAGTGGAGTCTGCGATAATCC |
| <i>NaBAK1-VIGS-SalI</i>  | ACGT <u>GTCGAC</u> GATTGGGTCAAGGGACTTC   |

\* Nucleotides underlined are *Bam*H I and *Sal* I sites

**Table S2 Primer sequences used for quantitative real-time PCR (SYBR Green analysis)**

| <i>Genes</i>    | <i>Forward Primer (5'-3')</i> | <i>Reverse Primer (5'-3')</i> |
|-----------------|-------------------------------|-------------------------------|
| <i>NaActin2</i> | GGTCGTACCACCGGTATTGTG         | GTCAAGACGGAGAATGGCATG         |
| <i>NaBAK1</i>   | TTAAGTCTTTATATTTGTATGTCAGGAA  | AAAAGAAAATACATTTGTGCTTCCAC    |
| <i>NaSERK1</i>  | GAACTCTAATTTTGTGATCTTGAAAGTT  | ATATAGCCACTACGCCTATGTTC       |
| <i>NaLOX3</i>   | GGCAGTGAAATTCAAAGTAAGAGC      | CCCAAAATTTGAATCCACAACA        |
| <i>NaAOS</i>    | GACGGCAAGAGTTTTCCCAC          | TAACCGCCGGTGAGTTCAGT          |
| <i>NaAOC</i>    | AACTACCTAACCTCTCATTTCTCA      | AAGCGAAGATAGGCAGGGC           |
| <i>NaOPR3</i>   | AATGGAGTTGGAGTTTGTTT          | AGGTGGTTGAAGCAGTCGTT          |
| <i>NaACX1</i>   | GAATGTCTGTTGCTTGTGCTCA        | TACCGCAAAGCACCTCCAG           |
| <i>NaTD</i>     | TAAGGCATTTGATGGGAGGC          | TCTCCCTGTTACGATAATGGAA        |
| <i>NaJAR4</i>   | ATGCCAGTCGGTCTAACTGAA         | TGCCATTGTGGAATCCTTTTAT        |
| <i>NaJAR6</i>   | TGGAGTAAACGTTAACCCGAAA        | AGAATTTGCTTGCTCAATGCCA        |
